# Supplementary material for: Simultaneous Targeting of NQO1 and SOD1 Eradicates Breast Cancer Stem Cells via Mitochondrial Futile Redox Cycling
Source: PubMed Central journal article supplement — Cancer Res. 2024 Sep 12;84(24):4264–82. doi: 10.1158/0008-5472.CAN-24-0800 (PMC11647209; doi:10.1158/0008-5472.can-24-0800), 2024-09-12
Supplement: can-24-0800_supplementary_data_suppsd.pdf [file can-24-0800_supplementary_data_suppsd.pdf]

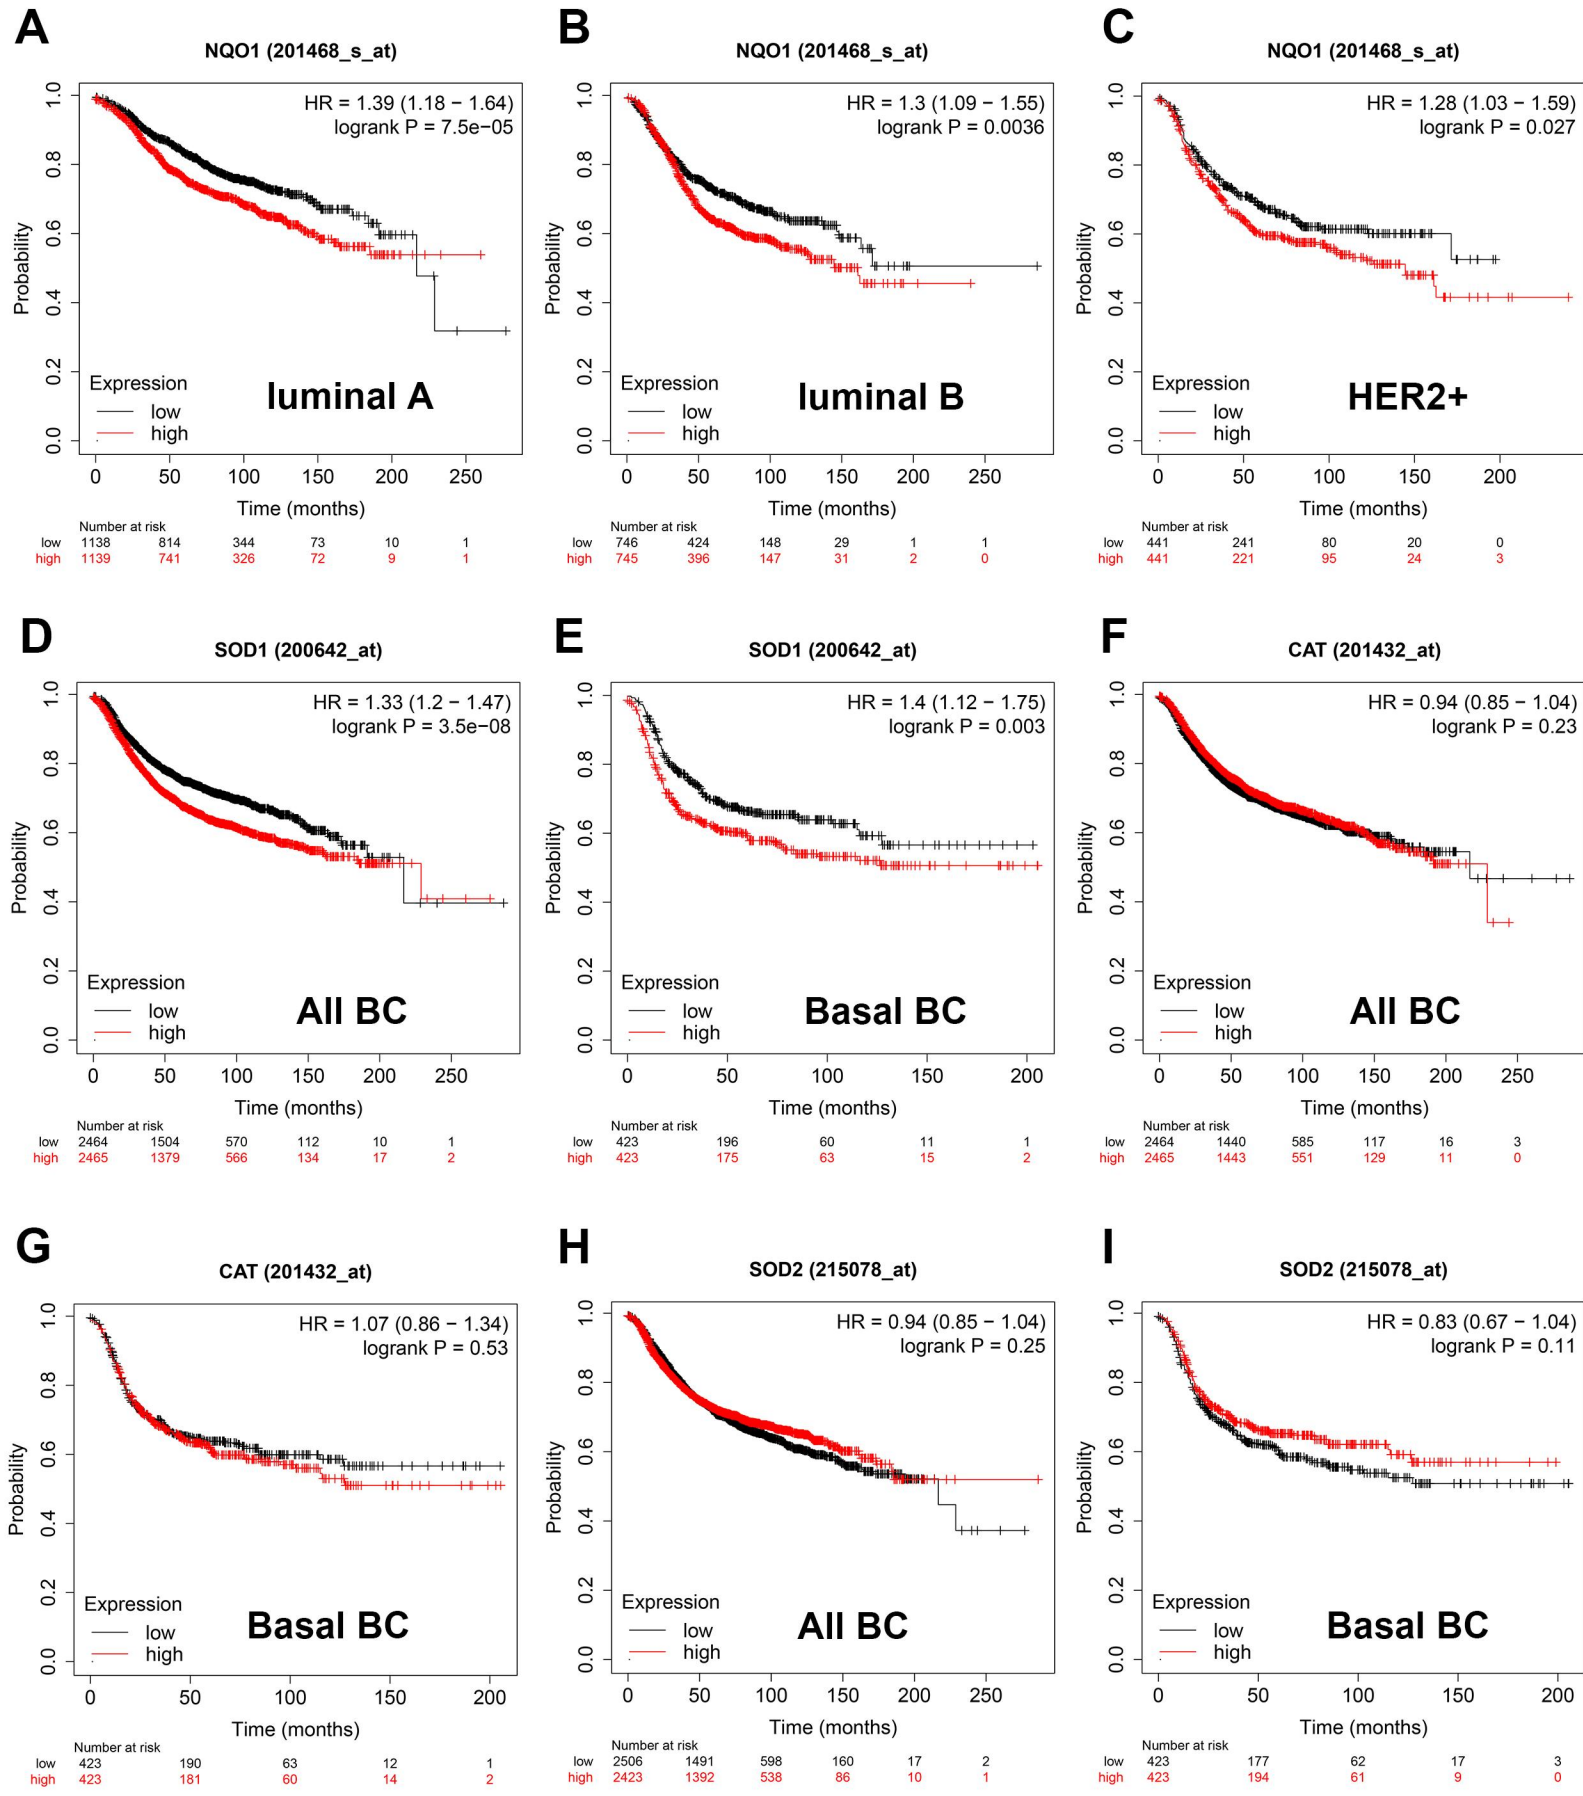

**Figure S1. The expression of NQO1 and SOD1 but not CAT and SOD2 correlates with poor patient survival of BC, related to Figure 1.**

**(A-C)** High NQO1 expression correlates with low recurrence-free survival (RFS) of luminal A **(A)**, luminal B **(B)** and HER2+**(C)** BC.

**(D-E)** High SOD1 expression correlates with low RFS of all BC subtypes **(D)** as well as basal BC **(E)**.

**(F-G)** CAT expression does not correlate with low RFS of all BC subtypes **(F)** as well as basal BC **(G)**.

**(H-I)** SOD2 expression has no correlation with low RFS of all BC subtypes **(H)** as well as basal BC **(I)**.

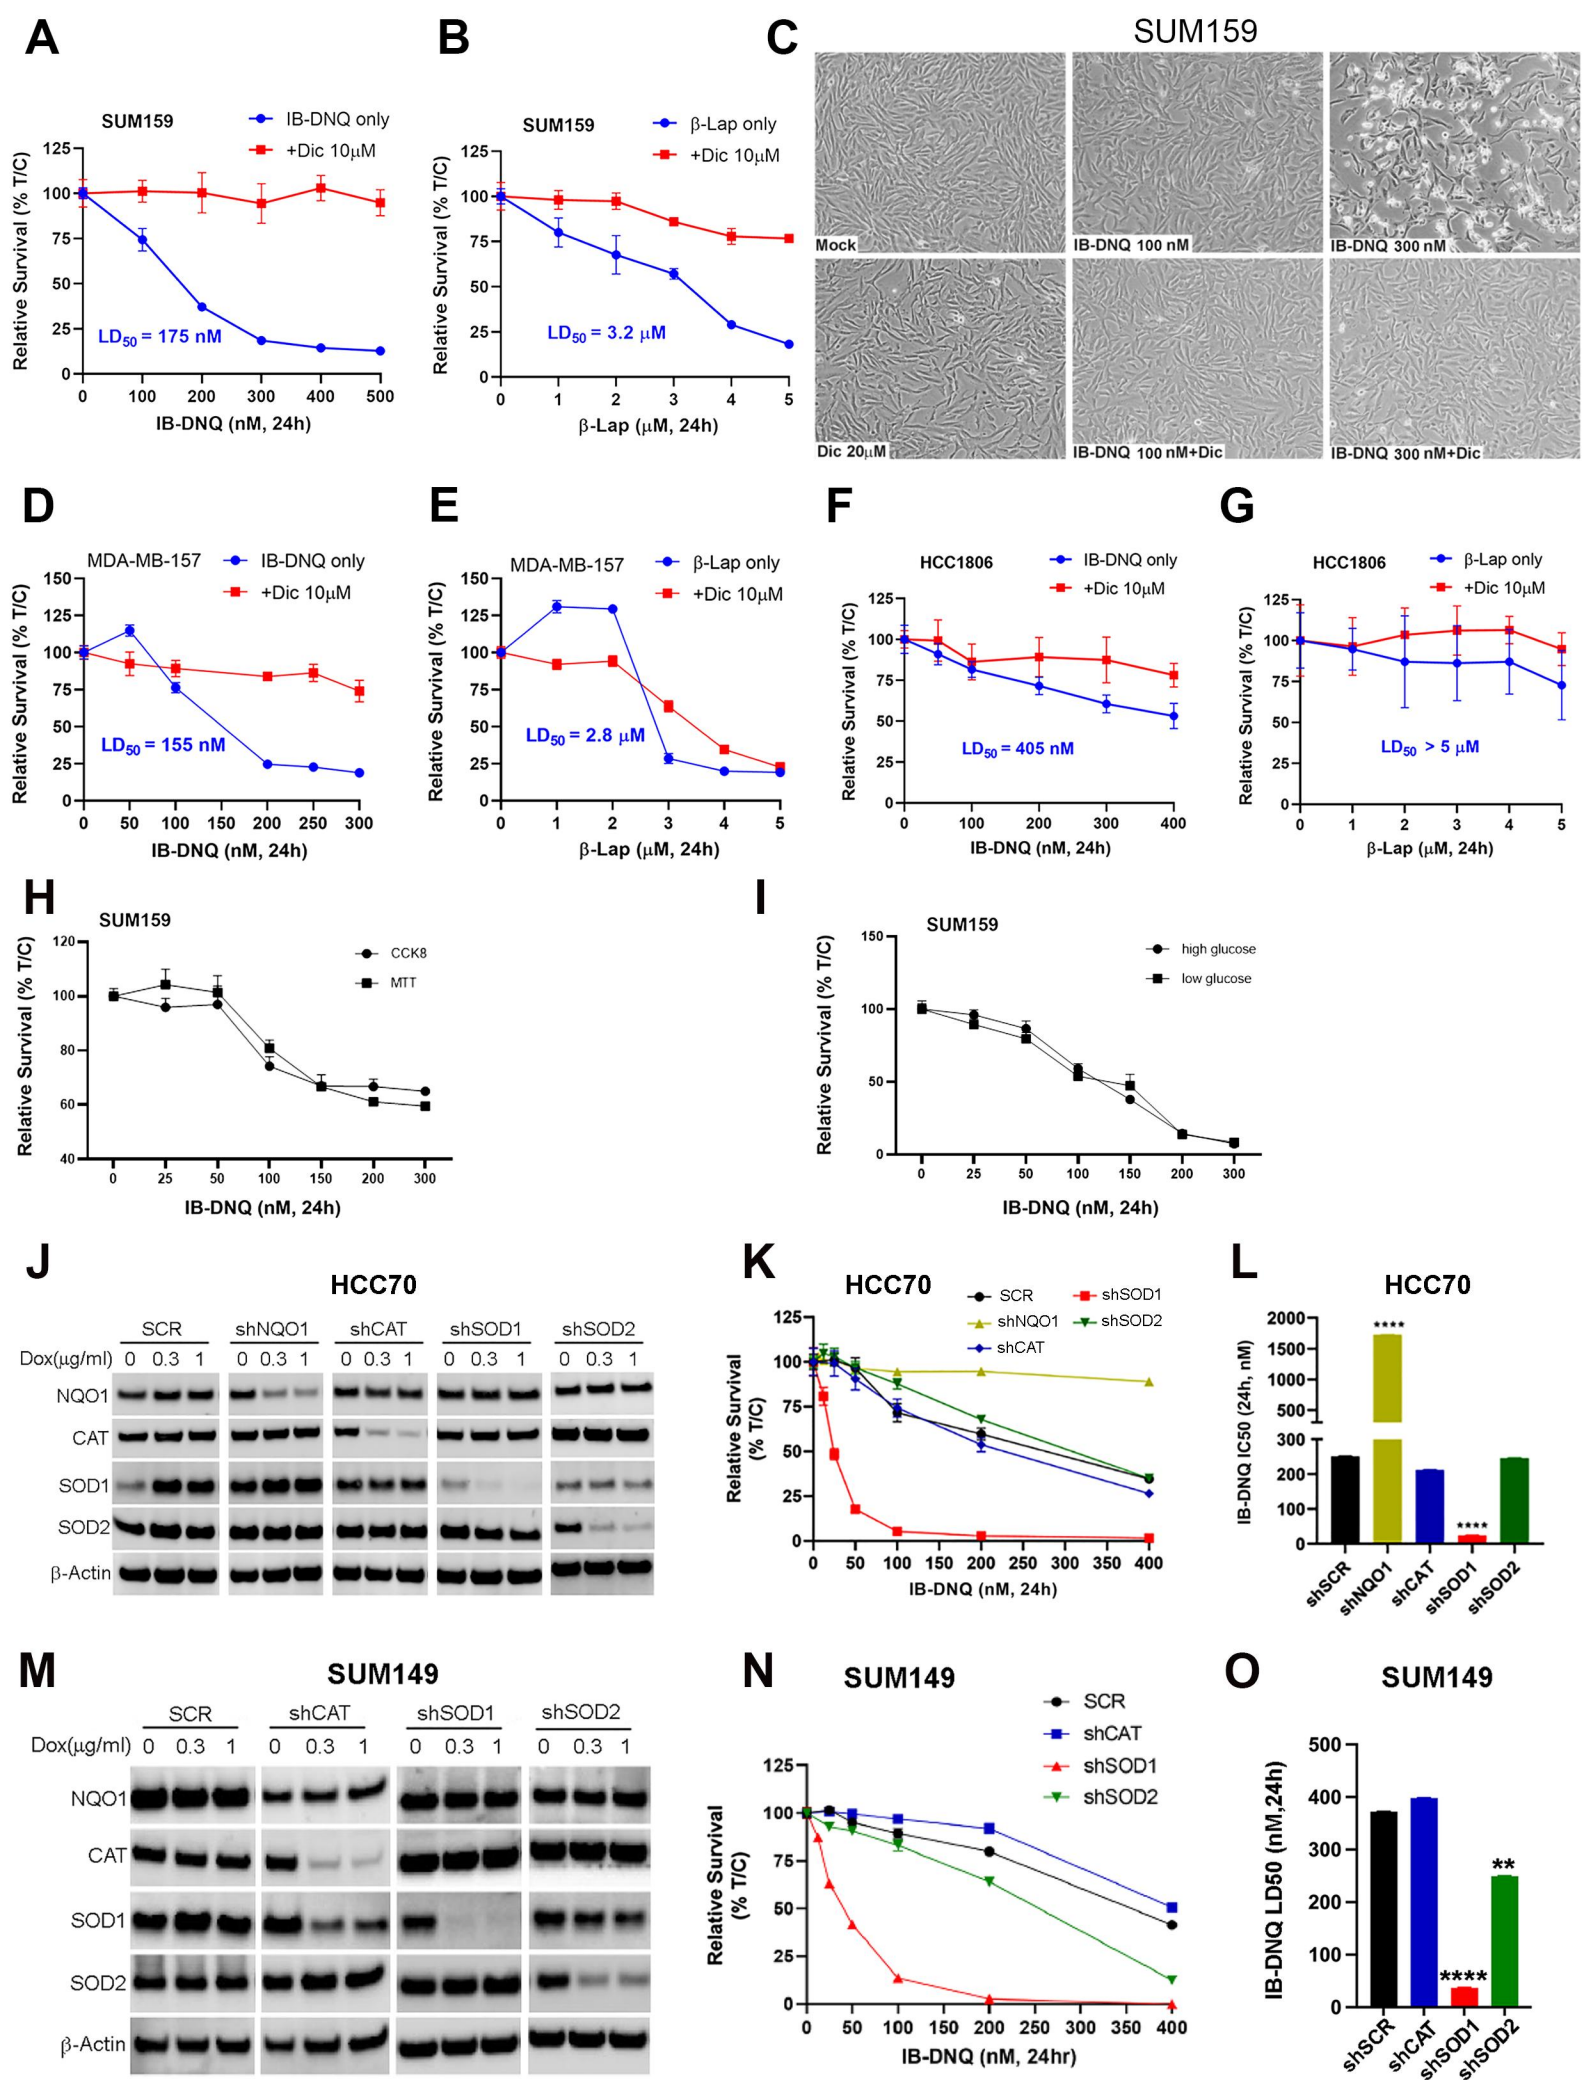

**Figure S2. IB-DNQ is more potent and specific than  $\beta$ -lap in killing TNBC cells and Dox-induced KD of SOD1 specifically enhances IB-DNQ's efficacy in killing TNBC cells, related to Figure 2.**

**(A-B)** Comparison of LD<sub>50</sub> of IB-DNQ (A) vs.  $\beta$ -lap (B) in SUM159 BC cells treated with each compound alone or together with the NQO1 inhibitor DIC. Error bars denote SEM (n=6).

**(C)** SUM159 BC cells treated with Mock (DMSO), DIC (20  $\mu$ M), IB-DNQ (100 or 300nM) alone, or combination of IB-DNQ (100 or 300nM) and DIC (20 $\mu$ M) for 24h and examined by light microscopy.

**(D-E)** Comparison of LD<sub>50</sub> of IB-DNQ (D) vs.  $\beta$ -lap (E) in MDA-MB-157 BC cells treated with each compound alone or together with NQO1 inhibitor DIC. Error bars denote SEM (n=6).

**(F-G)** Comparison of LD<sub>50</sub> of IB-DNQ (F) vs.  $\beta$ -lap (G) in NQO1<sup>lo</sup> HCC1806 BC cells treated with each compound alone or together with NQO1 inhibitor DIC. Error bars denote SEM (n=6).

**(H)** Relative survival of SUM159 BC cells treated with different doses of IB-DNQ measured by MTT vs. CCK8 assay. Error bars denote SEM (n=6).

**(I)** Relative survival of SUM159 BC cells treated with different doses of IB-DNQ in media containing high (25 mM) or low (5.5 mM) of glucose by CCK8 assay. Error bars denote SEM (n=6)

**(J-L)** Dox-inducible KD of NQO1, CAT, SOD1 and SOD2 in HCC70 BC cells validated by immunoblotting with respective antibodies (**J**), and KD of NQO1 renders HCC70 BC cells resistant to IB-DNQ treatment, while KD of SOD1, but not CAT or SOD2, in HCC70 significantly enhanced IB-DNQ-elicited lethality (**K** and **L**). \*\*\*\*: p< 0.0001 vs. shSCR (n=2, one-way ANOVA). Error bars denote SEM.

**(M-O)** Dox-inducible KD of CAT, SOD1 and SOD2 in NQO1<sup>lo</sup> SUM149 BC cells validated by immunoblotting with respective antibodies (**M**), and KD of SOD1 or SOD2 but not CAT in SUM149 significantly enhanced IB-DNQ-elicited lethality (**M** and **O**). \*\*, \*\*\*\*: p< 0.01 and 0.0001 vs. shSCR (n=2, one-way ANOVA). Error bars denote SEM.

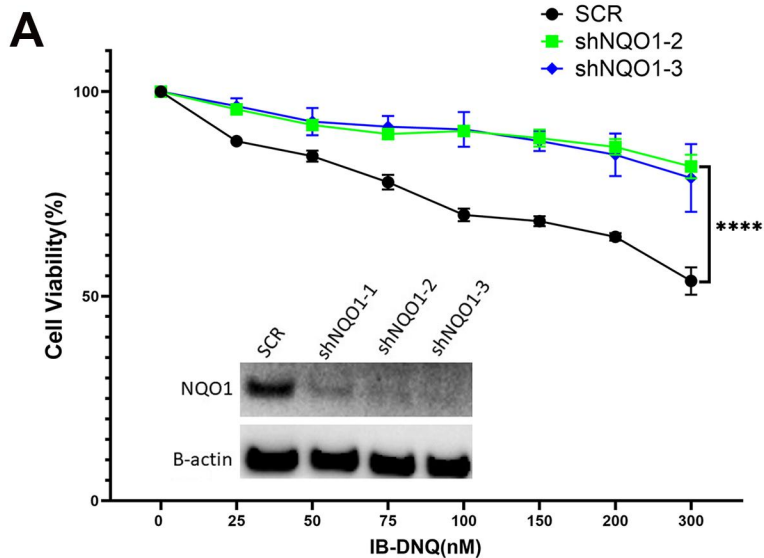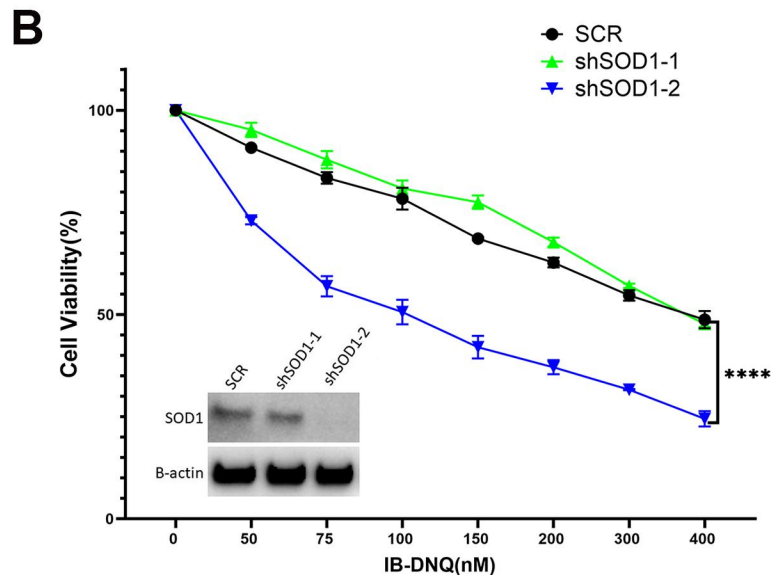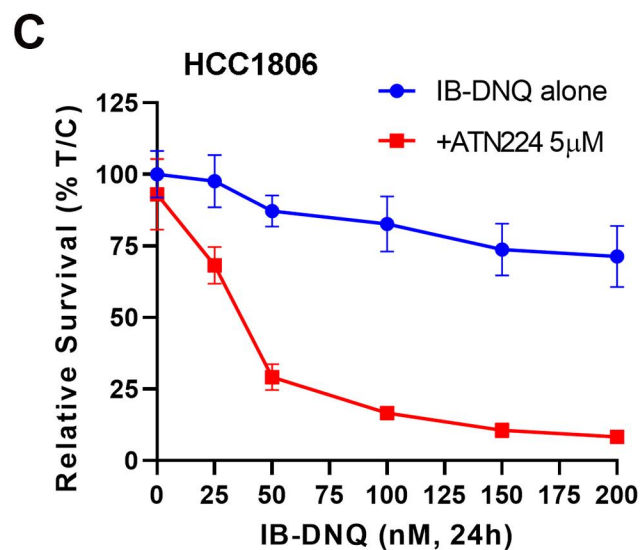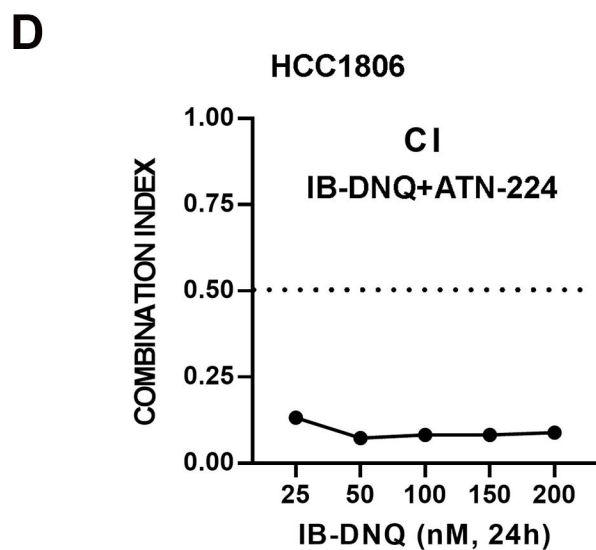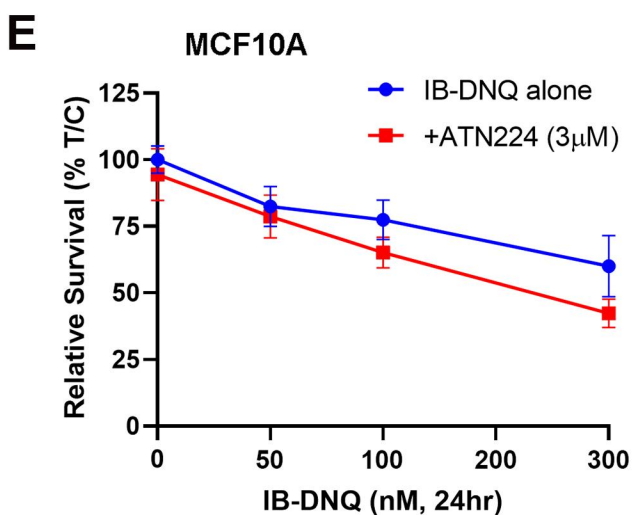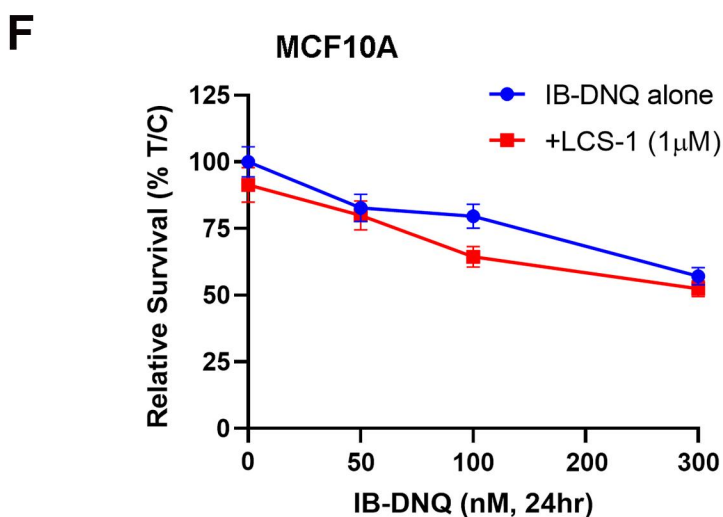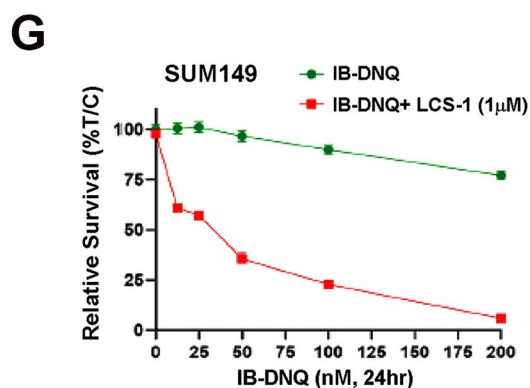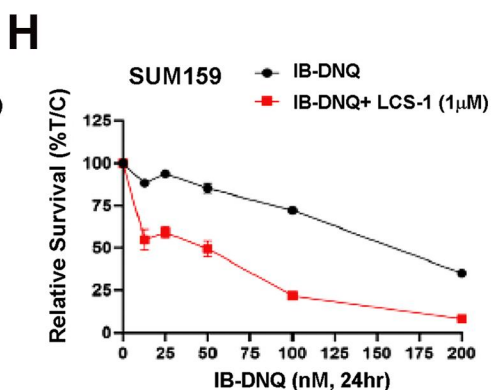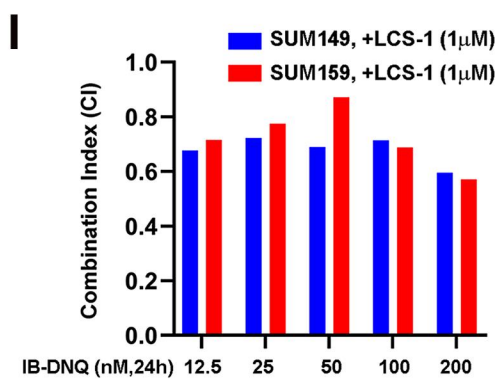

**Figure S3. SOD1 inhibitor ATN224 synergistically enhances IB-DNQ's efficacy in killing TNBC but not nontumorigenic mammary epithelial cell MCF10A, related to Figure 2.**

**(A)** Dox-induced KD of NQO1 in SUM159 BC cells with three different SMARTvector Dox-inducible lentiviral shRNA clones to validate the effect of knockdown of NQO1 expression in affecting IB-DNQ sensitivity, which is measured by MTT assay. \*\*\*\*:  $p < 0.0001$  (shNQO1-2 or shNQO1-3 vs. shSCR,  $n=6$ , two-way ANOVA). Error bars denote SEM.

**(B)** Dox-induced KD of SOD1 in SUM159 BC cells with two SMARTvector Dox-inducible lentiviral shRNA clones to validate the effect of knockdown of SOD1 expression in affecting IB-DNQ sensitivity, measured by MTT assay. \*\*\*\*:  $p < 0.0001$  (shSOD1-2 vs. shSCR or shSOD1-1,  $n=6$ , two-way ANOVA). Error bars denote SEM.

**(C-D)** Relative survival of NQO1<sup>lo</sup> HCC1806 BC cells treated with IB-DNQ alone or together with SOD1 inhibitor ATN224 (**C**,  $n=6$ ) and combination index (CI) of ATN224 (at 5  $\mu\text{M}$ ) with sublethal doses of IB-DNQ ranging from 12.5-200 nM in HCC1806 (**D**). Error bars denote SEM.

**(E-F)** Relative survival of NQO1<sup>lo</sup> MCF10A cells treated with with IB-DNQ alone or together with SOD1 inhibitor ATN224 (**E**,  $n=6$ ) or LCS-1 (**F**,  $n=6$ ). Error bars denote SEM.

**(G-I)** Relative survival of SUM149 (**G**,  $n=6$ ) and SUM159 (**H**,  $n=6$ ) TNBC cells treated with IB-DNQ alone or together with SOD1 inhibitor LCS-1, and combination index (CI) of LCS-1 (at 1  $\mu\text{M}$ ) together with various doses of IB-DNQ ranging from 12.5-200 nM in SUM149 and SUM159 BC cells (**I**). Error bars denote SEM.

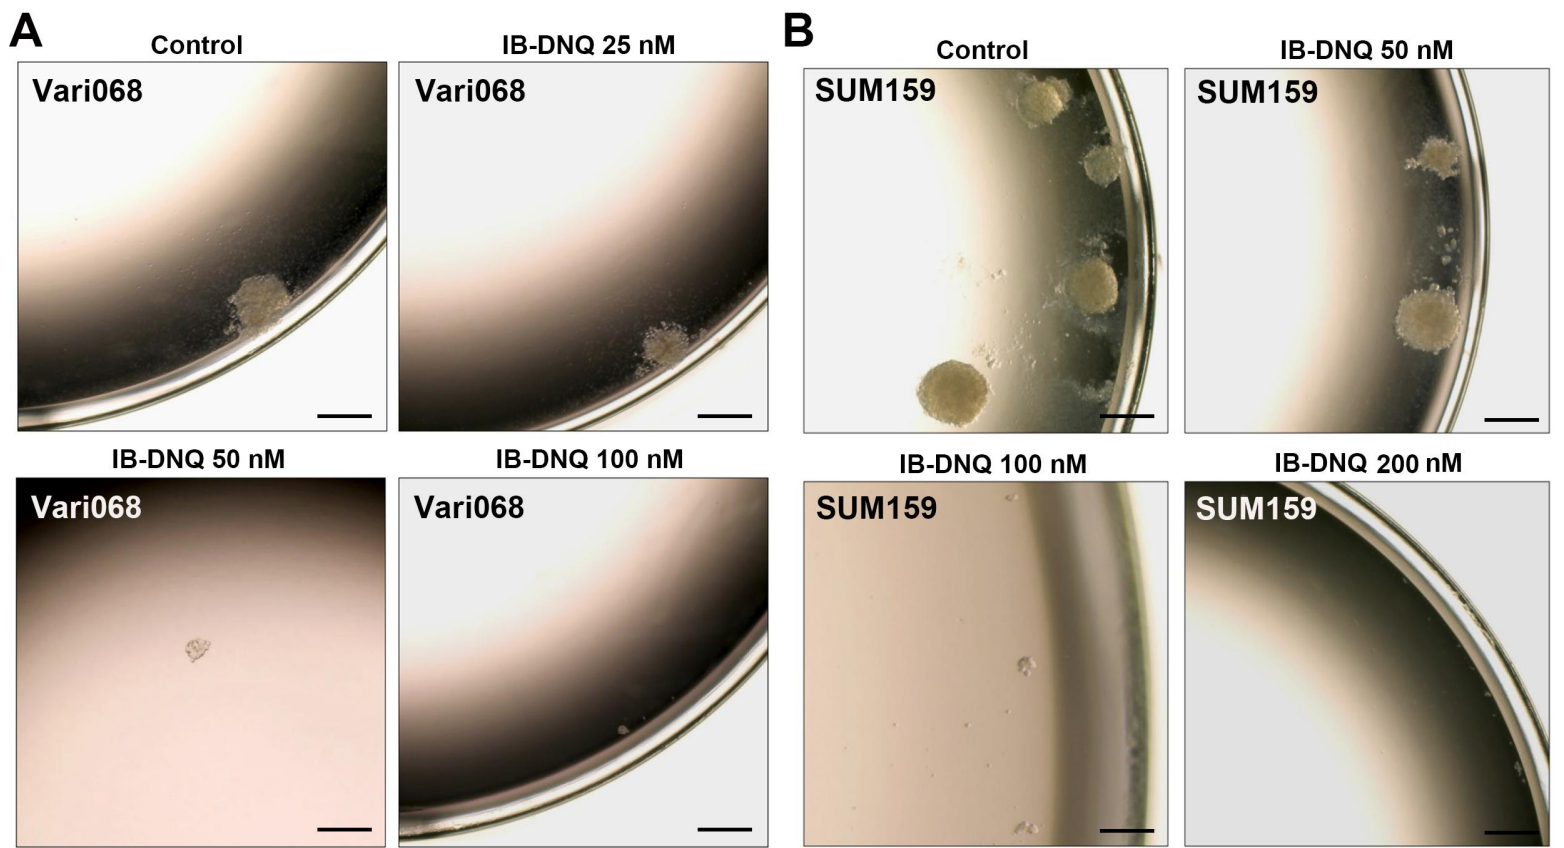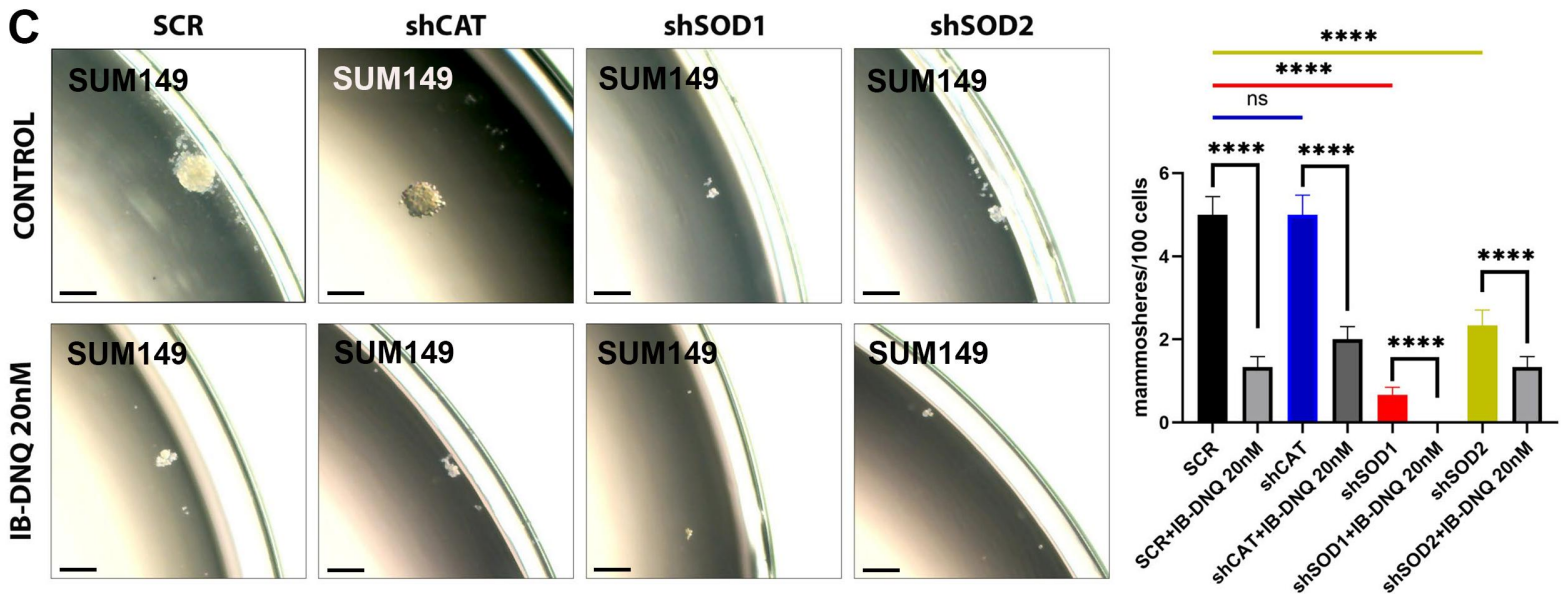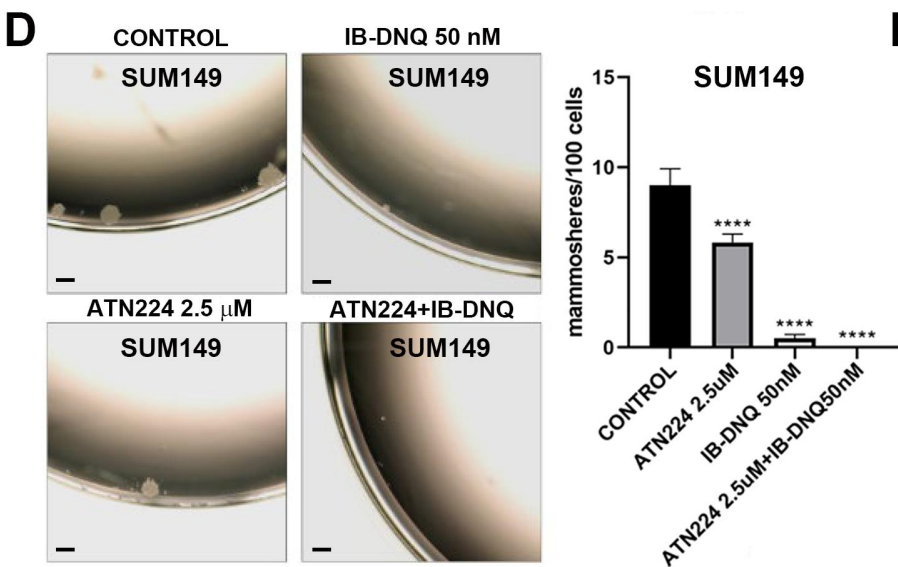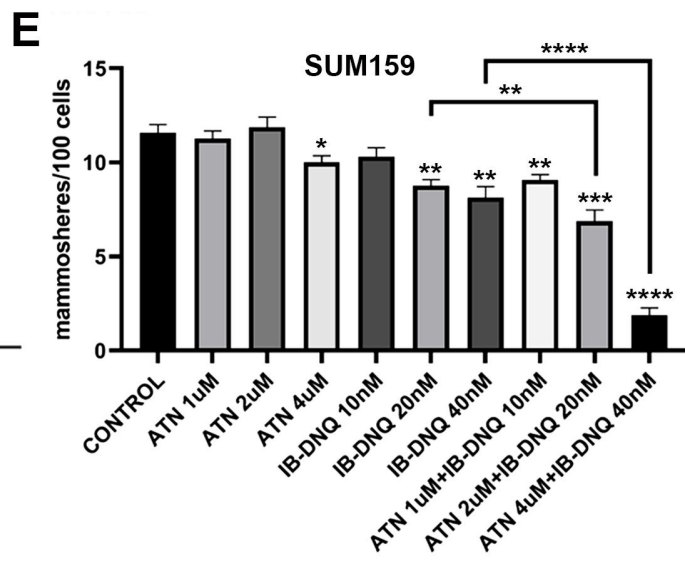

**Figure S4. IB-DNQ preferentially inhibits CSC activity and genetic or pharmacological inhibition of SOD1 potentiate the efficacy of IB-DNQ in suppressing tumorsphere-forming capacity of TNBC cells, related to Figure 3.**

**(A-B)** Tumorsphere formation of Vari068 **(A)** and SUM159 **(B)** BC cells sorted into 96-well ultralow-attachment plates at density of 20 cells/well. Bar: 200  $\mu\text{m}$ .

**(C)** Tumorsphere formation assay at clonal density (20 cells/well) was performed to examine the effects of Dox (0.5  $\mu\text{g/ml}$ ) induced KD of CAT, SOD1 or SOD2 vs. SCR in affecting sphere-forming capacity of SUM149 BC cells and their impact on IB-DNQ-mediated suppression of tumorsphere formation. Bar: 200  $\mu\text{m}$ . \*\*\*\*:  $P < 0.0001$  ( $n=3$ , one-way ANOVA). Error bars denote SEM.

**(D)** Tumorsphere formation of SUM149 BC cells treated with vehicle (DMSO), IB-DNQ (50nM), ATN224 (2.5  $\mu\text{M}$ ), or IB-DNQ (50nM) plus ATN224 (2.5  $\mu\text{M}$ ). Bar: 200  $\mu\text{m}$ . \*\*\*\*:  $P < 0.0001$  ( $n=3$ , one-way ANOVA). Error bars denote SEM.

**(E)** Tumorsphere formation of SUM159 BC cells treated with vehicle (DMSO), ATN224 (1-4  $\mu\text{M}$ ), IB-DNQ (10-40 nM) or IB-DNQ plus ATN224 at different doses. \*, \*\*, \*\*\*, \*\*\*\*:  $P < 0.05$ , 0.01, 0.001 or 0.0001 (vs. Control,  $n=3$ , one-way ANOVA). Error bars denote SEM.



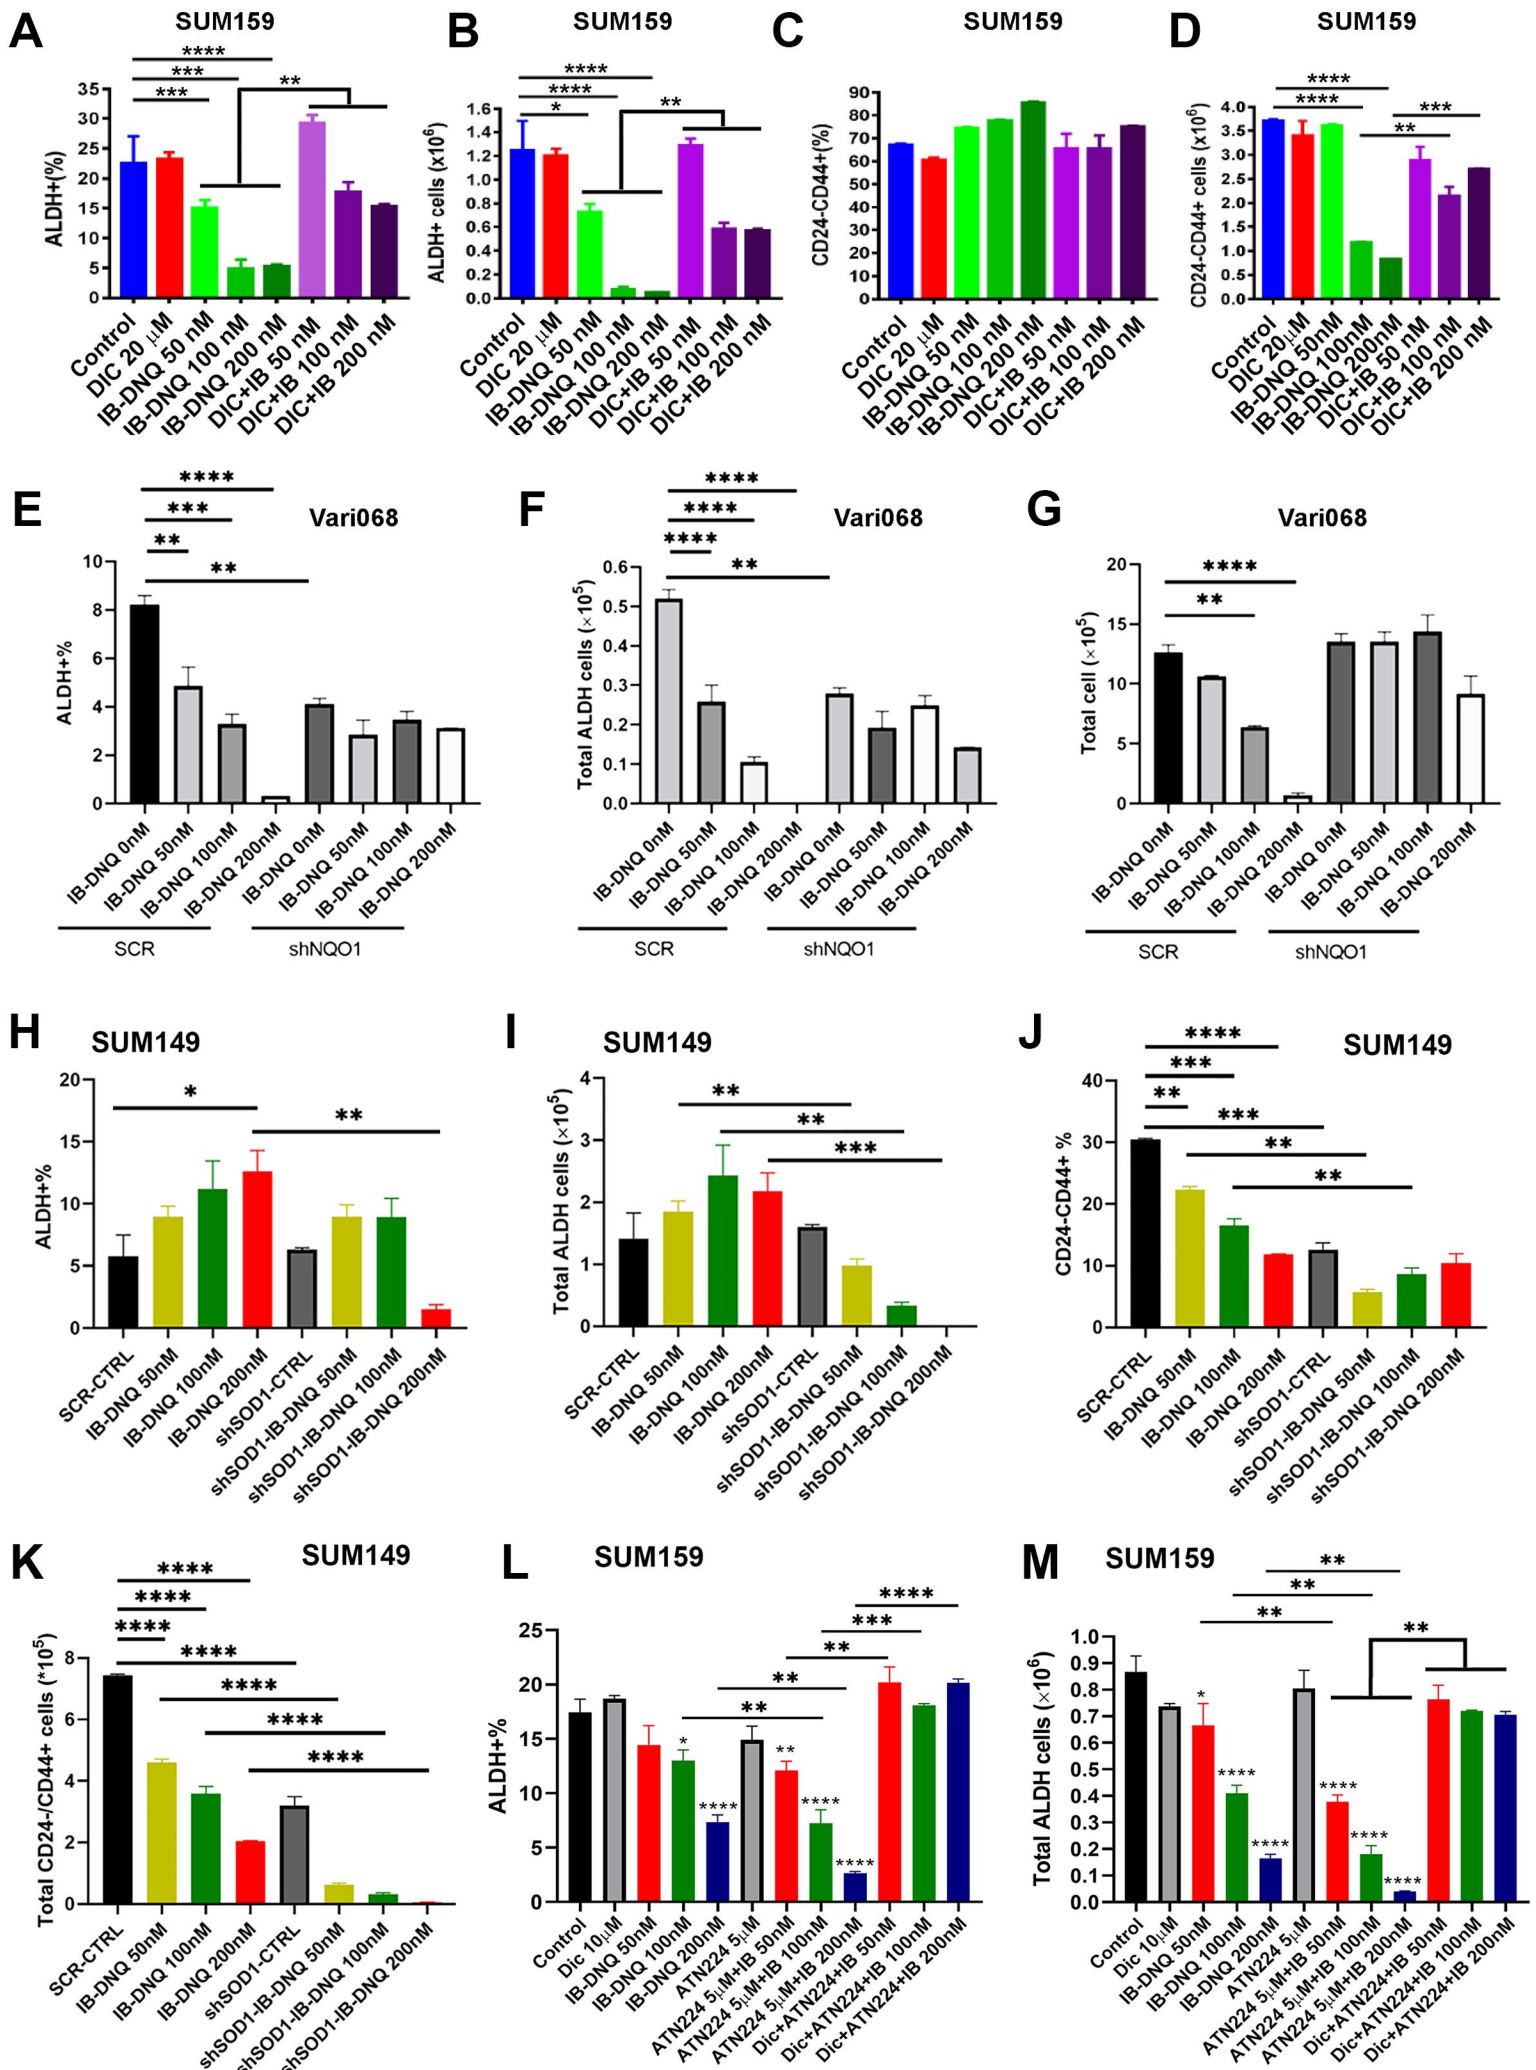

**Figure S5. IB-DNQ preferentially inhibits ALDH+ CSCs in a NQO1-dependent manner and genetic or pharmacological inhibition of SOD1 potentiate the efficacy of IB-DNQ in suppressing both ALDH+ E- and CD24-CD44+ M-CSC-like cells, related to Figure 3.**

**(A-D)** SUM159 BC cells were treated with Control (DMSO), DIC (20  $\mu$ M), IB-DNQ (50-200 nM) alone or IB-DNQ together DIC for 20h, and examined by flow cytometry to measure the content and absolute number of ALDH+ (**A** and **B**) and CD24-CD44+ (**C** and **D**) CSC-like cells. \*, \*\*, \*\*\*, \*\*\*\*:  $P < 0.05, 0.01, 0.001$  or  $0.0001$  respectively (n=3). Error bars denote SEM.

**(E-G)** Vari068 BC cells expressing SCR or shNQO1 were pretreated with Dox (0.5  $\mu$ g/ml) for 48h and then treated with different doses of IB-DNQ (0-200nM) for 20h to examine the percentage and total number of ALDH+ CSCs. \*\*, \*\*\*, \*\*\*\*:  $P < 0.01, 0.001, 0.0001$  respectively (n=3). Error bars denote SEM.

**(H-K)** SUM149 BC cells expressing SCR or shSOD1 were pretreated with Dox (0.5  $\mu$ g/ml) for 48h, and then treated with different doses of IB-DNQ (50, 100, 200nM) for 20h to examine the percentage and total number of ALDH+ and CD24-CD44+ CSCs. \*, \*\*, \*\*\*, \*\*\*\*:  $P < 0.05, 0.01, 0.001, 0.0001$  respectively (n=3). Error bars denote SEM.

**(L-M)** SUM159 BC cells were treated with Control (DMSO), DIC (10  $\mu$ M), IB-DNQ (50-200 nM), ATN224 (5  $\mu$ M) alone or IB-DNQ together with ATN224 and/or DIC for 20h, and examined by flow cytometry to measure the content (L) and absolute number (M) of ALDH+ CSCs. \*, \*\*, \*\*\*, \*\*\*\*:  $P < 0.05, 0.01, 0.001$  or  $0.0001$  respectively vs. Control or indicated with brackets (n=3). Error bars denote SEM.

**A**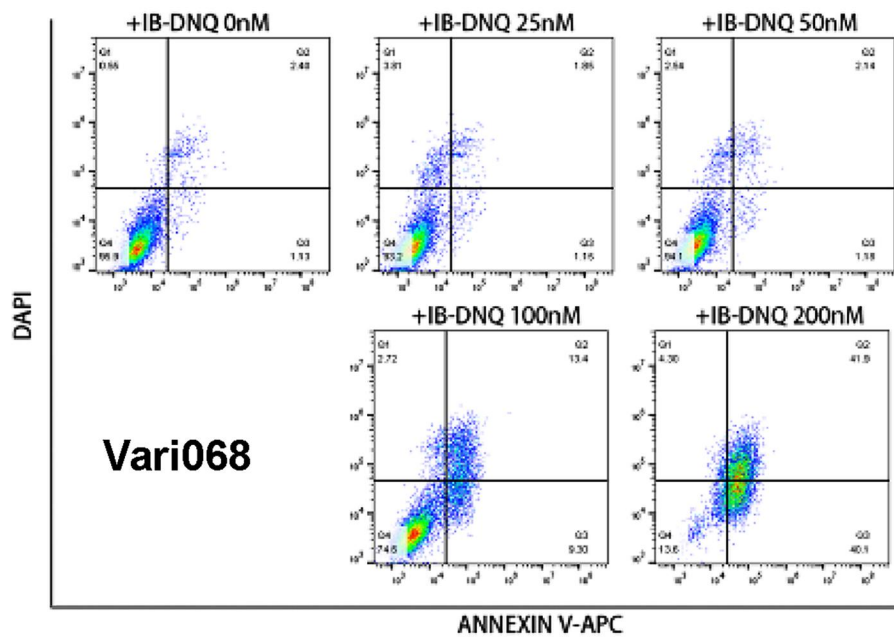**B****SUM159 Superoxide**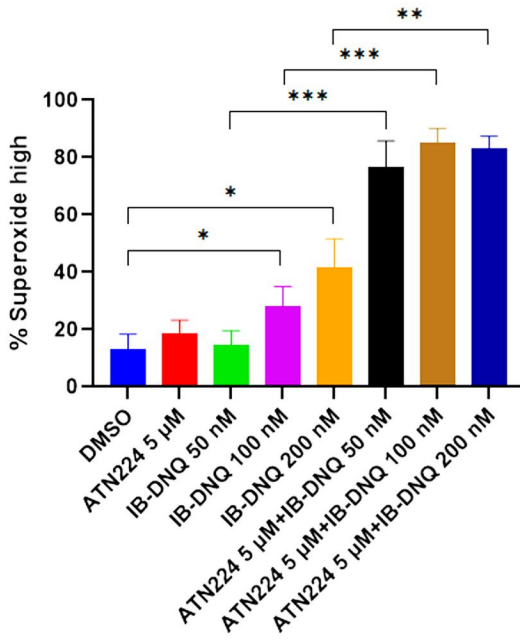**D**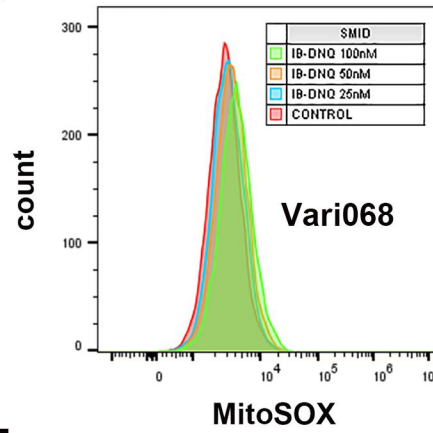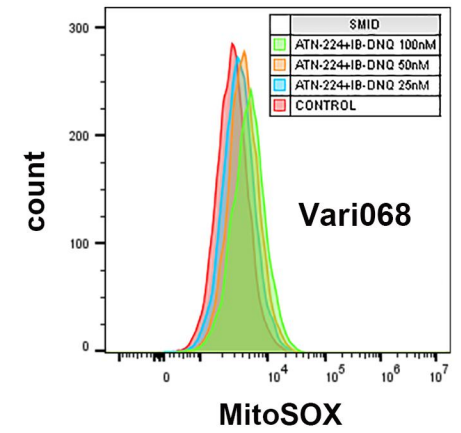**E**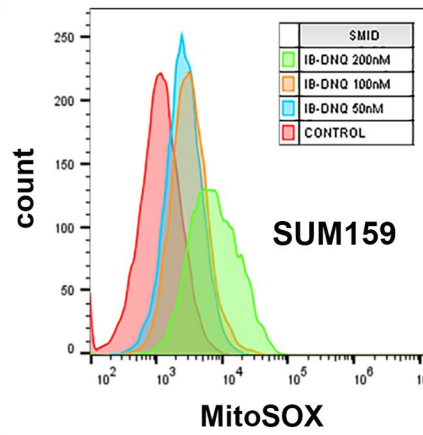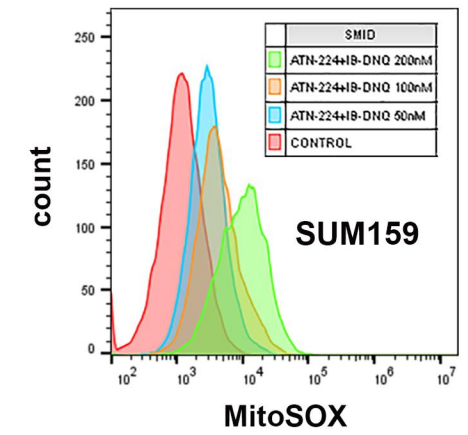**C****SUM149 Superoxide**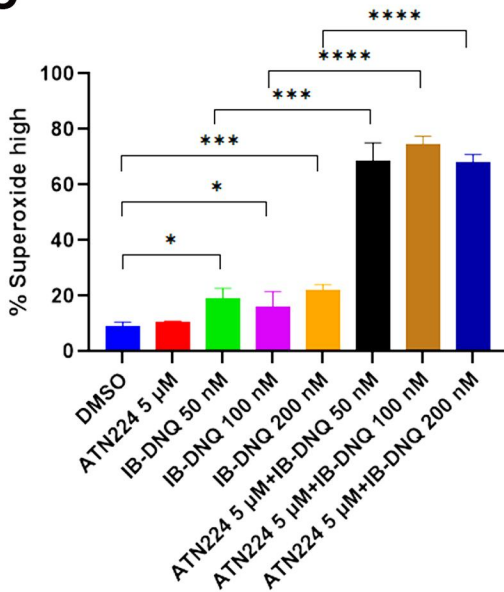**F**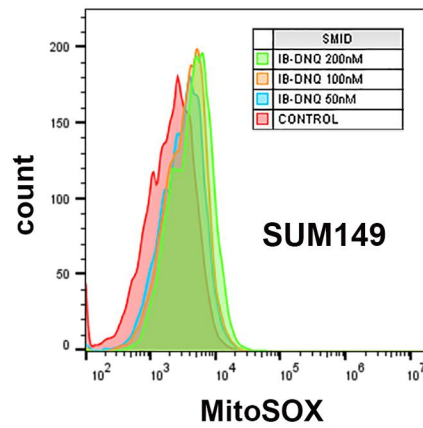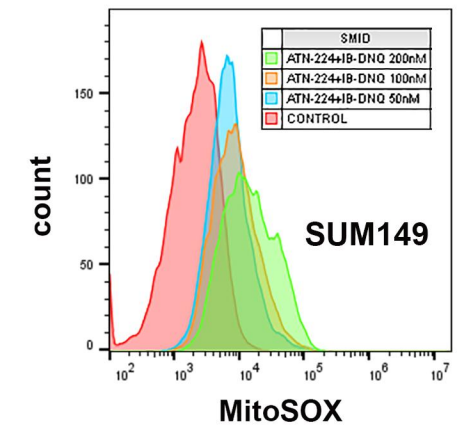

**Figure S6. IB-DNQ treatment induces apoptotic death of TNBC cells overexpressing NQO1 and SOD1 inhibitor ATN224 potentiates the ability of IB-DNQ to elevate mitoROS in TNBC expressing different levels of NQO1, related to Figure 4 and Figure 5.**

**(A)** IB-DNQ treatment dose-dependently induces apoptosis of NQO<sup>hi</sup> Vari068 BC cells as examined by Annexin V labeling and flow cytometry, related to Figure 4.

**(B-C)** Measurement of cellular superoxide levels in SUM159 **(B)** and SUM149 **(C)** BC cells treated with vehicle (DMSO) and different doses of IB-DNQ alone or together with ATN224. \*, \*\*, \*\*\*, \*\*\*\*: P < 0.05, 0.01, 0.001 and 0.0001 vs. Control or indicated with brackets (n=3). Error bars denote SEM.

**(D-F)** Vari068 **(D)**, SUM159 **(E)** and SUM149 **(F)** BC cells treated with different doses of IB-DNQ alone or IB-DNQ plus ATN224 were stained with MitoSOX red (2.5  $\mu$ M) and mean fluorescence intensity (MFI) of MitoSOX red was analyzed in each condition by flow cytometry, related to Figure 5.

**A**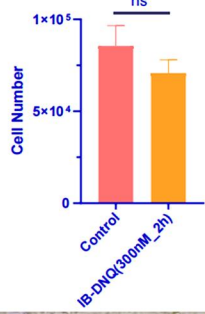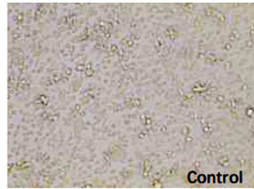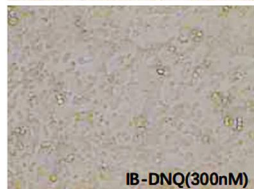**B**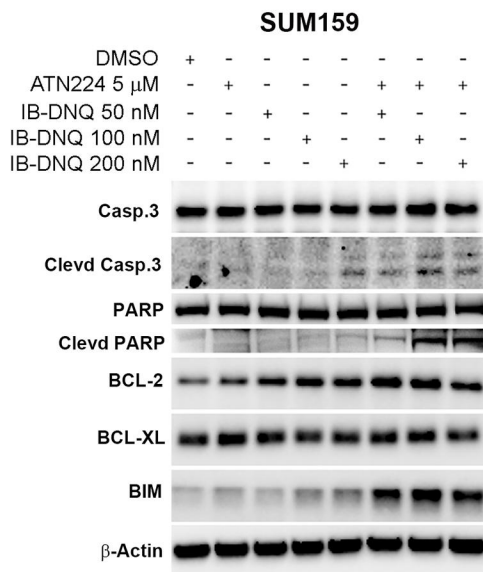**C**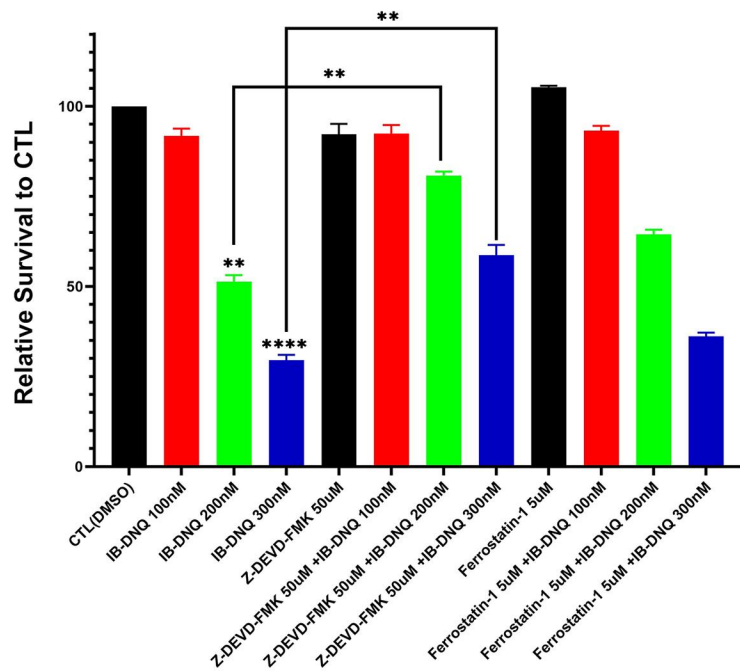**D**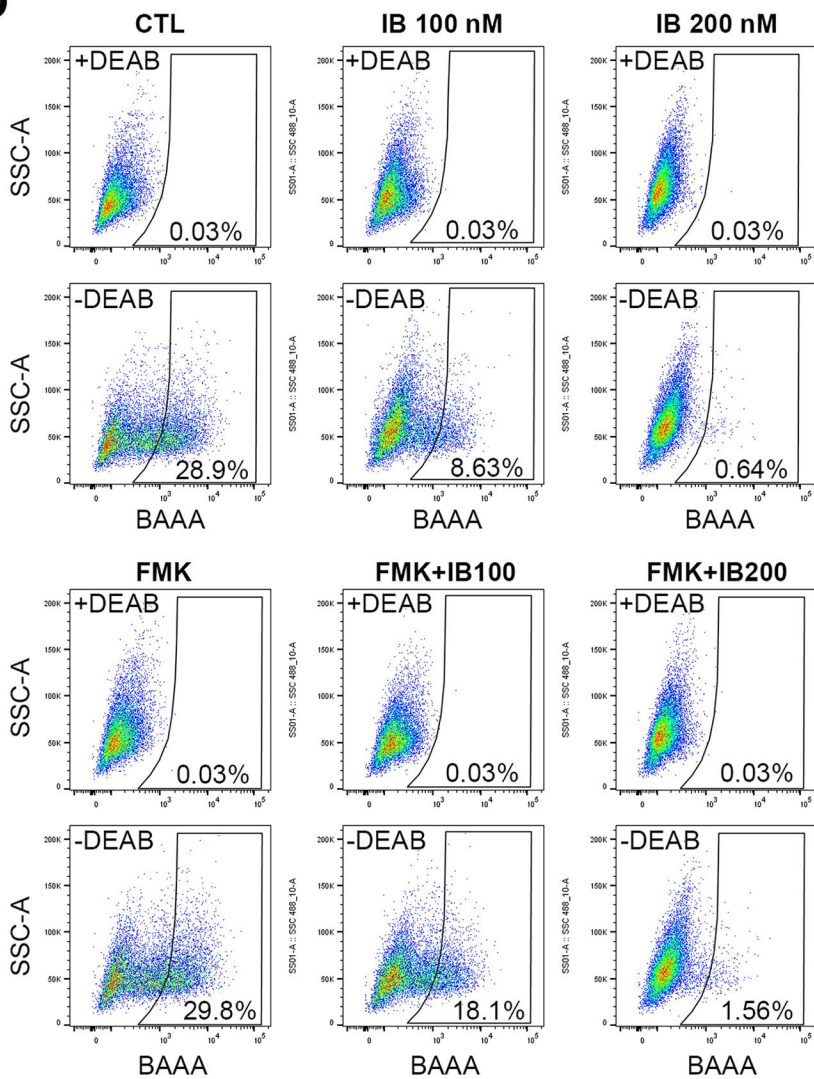**SUM159**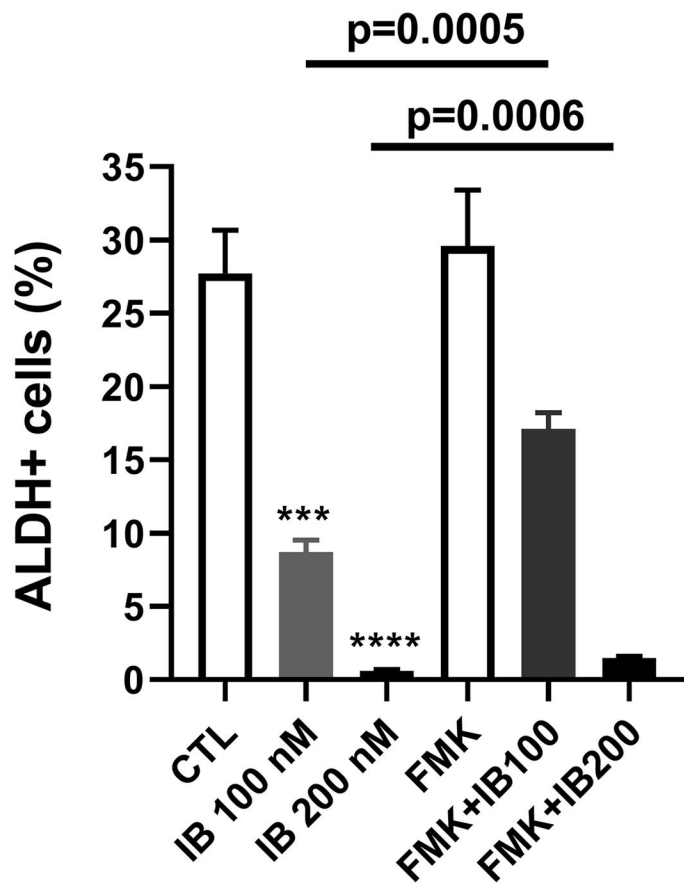

**Figure S7. IB-DNQ induced cell death and abrogation of ALDH+ BCSCs in SUM159 is rescued by Casp 3 inhibitor Z-DEVD-FMK, related to Figure 6.**

**(A)** SUM159 BC cells treated with 300 nM of IB-DNQ for 2h were examined by CCK8 assay (upper panel) and optical microscopy (lower panels) to examine the viability of SUM159 BC cells (n=3). ns: not significantly different.

**(B)** SUM159 BC cells were treated with vehicle, ATN224 (5  $\mu$ M), and 50-200 nM of IB-DNQ alone or in combination with ATN224 for 20h, and subjected to immunoblotting to examine the activation of Casp3 and the cleavage of its substrate PARP, as well as the expression of anti- and pro-apoptotic BCL2 family proteins.

**(C)** SUM159 BC cells treated with CTL(DMSO), Z-DEVD-FMK (50  $\mu$ M), Ferrostatin-1 (5  $\mu$ M) or IB-DNQ (100-300nM) alone, or combination of IB-DNQ with Z-DEVD-FMK or Ferrostatin-1 for 4h, and relative survival of SUM159 BC were measured with MTT assay (n=6). \*\*, \*\*\*\*: P< 0.01 or 0.0001 (vs. CTL or indicated with brackets). Data are representatives of two independent experiments.

**(D)** SUM159 BC cells treated with Mock (DMSO), Z-DEVD-FMK (50  $\mu$ M), IB-DNQ (100-200nM) alone, or combination of IB-DNQ and Z-DEVD-FMK for 3h and examined for ALDH+ CSCs by Aldefluor assay and flow cytometry (left panel). The proportion of ALDH+ CSCs in each condition was plotted based on 3 independent experiments (right panel). \*\*\*, \*\*\*\*: P< 0.001 and 0.0001 respectively vs. CTL (DMSO). Error bars denote SD (standard deviations). DEAB: the inhibitor of ALDH enzymatic activity. BAAA: the substrate of ALDH enzymatic activity.

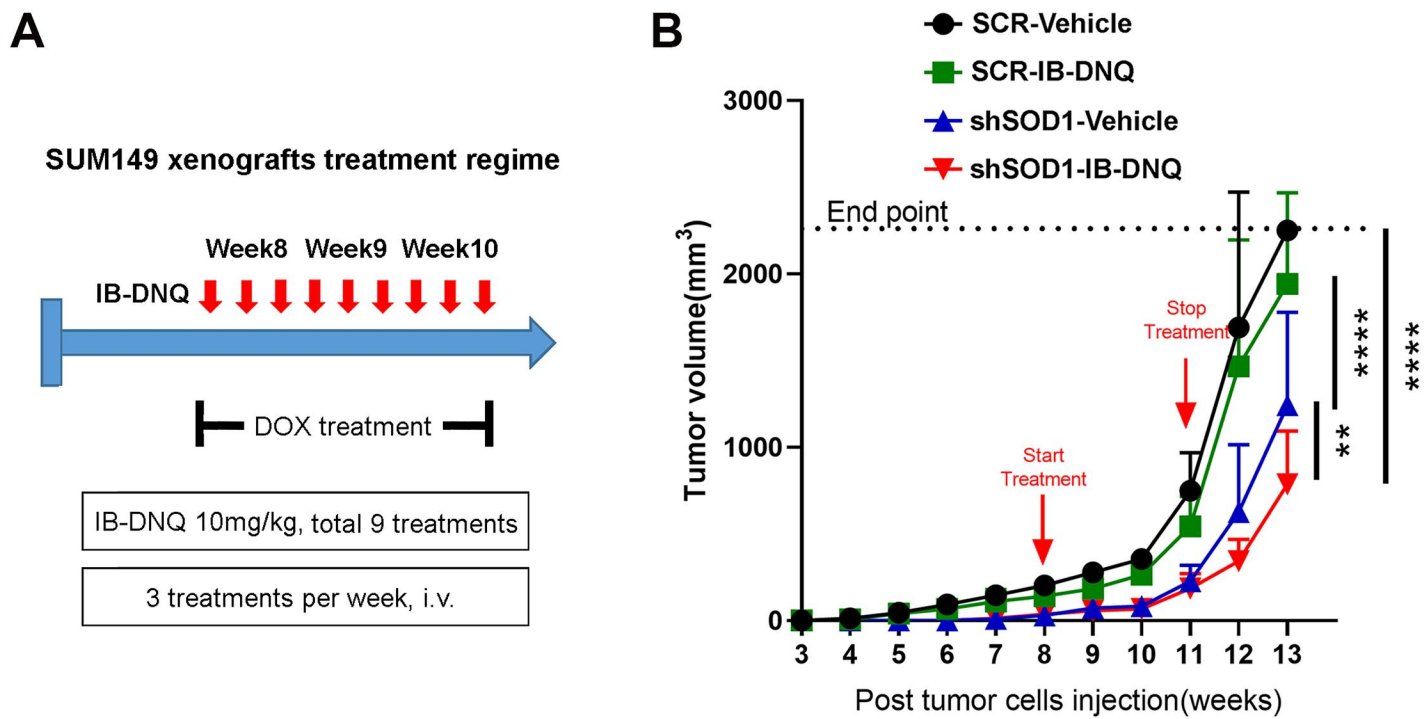

**Figure S8. Dox-induced KD of SOD1 suppresses tumor growth of SUM149 BC cells and IB-DNQ treatment further enhances tumor growth retardation of SOD1 KD cells, related to Figure 7.**

(A) SUM149 BC cells expressing Dox-inducible KD (shSOD1) or scrambled control (SCR) were injected into the #4 MFP of 7-wk-old female SCID mice, and mice bearing mammary tumors (3-4 mm in diameter) expressing shSOD1 or SCR sequence were each randomized into two groups (6 mice/group) and subject to treatment with Dox (200  $\mu$ g/ml in water) plus vehicle (20% HP $\beta$ CD, i.v.) or IB-DNQ (10 mg/kg, i.v.) for 3 weeks.

(B) Tumor growth of SUM149 BC cells expressing SCR or shSOD1 after treated with Dox (200  $\mu$ g/ml in water) plus vehicle or IB-DNQ. \*\*, \*\*\*\*:  $P < 0.01$  or  $0.0001$  respectively (n=6, two-way ANOVA). Error bars denote SD.

## KEY RESOURCES TABLE

| REAGENT or RESOURCE              | SOURCE                       | IDENTIFIER                            |
|----------------------------------|------------------------------|---------------------------------------|
| Antibodies and Labeling Reagents |                              |                                       |
| Anti-ALDH1A1                     | Invitrogen                   | Cat# MA5-29023<br>RRID:<br>AB_2784960 |
| Anti-ALDH1A3                     | Invitrogen                   | Cat# PA5-29188<br>RRID:<br>AB_2546664 |
| Anti-BCL-2                       | Cell Signaling<br>Technology | Cat# 15071S                           |
| Anti-BCL-xL                      | Cell Signaling<br>Technology | Cat# 2764S                            |
| Anti- $\beta$ -Actin             | Cell Signaling<br>Technology | Cat# 4970S                            |
| Anti-Bim                         | Cell Signaling<br>Technology | Cat# 2933S                            |
| Anti-Caspase-3                   | Cell Signaling<br>Technology | Cat# 9662S                            |
| Anti-Cleaved Caspase-3           | Cell Signaling<br>Technology | Cat# 9661S                            |
| Anti-Catalase                    | Cell Signaling<br>Technology | Cat# 12980S                           |
| Anti-Cytochrome c                | Cell Signaling<br>Technology | Cat# 12963S                           |
| Anti-Ki67                        | Cell Signaling<br>Technology | Cat# 12202S                           |
| Anti-NQO1                        | Cell Signaling<br>Technology | Cat# 62262S                           |
| Anti NRF2                        | Cell Signaling<br>Technology | Cat# 12721S                           |
| Anti-p-H2A.X                     | Cell Signaling<br>Technology | Cat# 2577S                            |
| Anti-PARP                        | Cell Signaling<br>Technology | Cat# 9542S                            |
| Anti-Cleaved PARP                | Cell Signaling<br>Technology | Cat# 5625S                            |
| Anti-SDHA                        | Cell Signaling<br>Technology | Cat# 5839S                            |
| Anti-Skp1                        | Cell Signaling<br>Technology | Cat# 2156S                            |



|                                               |                           |                                     |
|-----------------------------------------------|---------------------------|-------------------------------------|
| Anti-SOD1                                     | Cell Signaling Technology | Cat# 37385S                         |
| Anti-SOD1                                     | Cell Signaling Technology | Cat# 4266S                          |
| Anti-SOD2                                     | Cell Signaling Technology | Cat# 13141S                         |
| Anti-VDAC                                     | Cell Signaling Technology | Cat# 4661S                          |
| Anti-Rabbit IgG, HRP Linked Antibody          | Cell Signaling Technology | Cat# 7074S                          |
| Anti-Mouse IgG, HRP Linked Antibody           | Cell Signaling Technology | Cat# 7076S                          |
| APC mouse Anti-human CD44                     | BD Biosciences            | Cat# 559942<br>RRID:<br>AB 398683   |
| APC anti-mouse H-2K[d]                        | BioLegend                 | Cat# 116620<br>AB 10645328          |
| FITC Anti-human CD24                          | BD Biosciences            | Cat# 560992<br>RRID:<br>AB 10562033 |
| FITC Anti-human CD44                          | BD Biosciences            | Cat# 555478<br>RRID:AB_395870       |
| PE anti-mouse H-2K[d]                         | BD Biosciences            | Cat# 553566<br>RRID:<br>AB 394924   |
| PE/Cy7 Anti-human CD24                        | BD Biosciences            | Cat# 561646<br>AB 10892826          |
| PE/Cy7 Anti-human CD24                        | BioLegend                 | Cat# 311120<br>AB 2259843           |
| DAPI                                          | Sigma-Aldrich             | Cat# D9542                          |
| APC Annexin V                                 | BD Biosciences            | Cat#550474<br>AB 2868885            |
| CellROX® Orange Reagent                       | Thermo Fisher Scientific  | Cat# C10443                         |
| MitoSOX™ Red                                  | Thermo Fisher Scientific  | Cat# M36008                         |
| Chemicals, Peptides, and Recombinant Proteins |                           |                                     |
| ATN224                                        | Cayman Chemical           | Cat# 23553<br>CAS: 649749-10-0      |
| 3-AT                                          | Sigma-Aldrich             | Cat# A8056<br>CAS: 61-82-5          |
| Dicoumarol                                    | Sigma-Aldrich             | Cat# 2287897<br>CAS: 66-76-2        |
| Doxycycline                                   | Sigma-Aldrich             | Cat# D3072<br>CAS: 10592-13-9       |

|                                                                                                      |                                            |                                                                    |
|------------------------------------------------------------------------------------------------------|--------------------------------------------|--------------------------------------------------------------------|
| IB-DNQ                                                                                               | Provided by Dr. Paul J. Hergenrother       | N/A                                                                |
| $\beta$ -Lapachone                                                                                   | MedChemExpress (MCE)                       | Cat# HY-13555<br>CAS: 4707-32-8                                    |
| LCS-1                                                                                                | MedChemExpress (MCE)                       | Cat# HY-115445<br>CAS: 41931-13-9                                  |
| Z-DEVD-FMK (Caspase-3 Inhibitor)                                                                     | Selleck Chemicals                          | Cat#: S7312<br>CAS: 210344-95-9                                    |
| Ferrostatin-1                                                                                        | Selleck Chemicals                          | Cat# : S7243<br>CAS: 347174-05-4                                   |
| Matrigel® Basement Membrane Matrix                                                                   | Corning Life Sciences                      | Cat# 354234                                                        |
| Critical Commercial Assays                                                                           |                                            |                                                                    |
| Aldefluor Assay kit                                                                                  | STEMCELL Technologies                      | Cat# 01700                                                         |
| In Situ Cell Death Detection Kit (TUNEL assay)                                                       | Roche                                      | Cat#11684795910                                                    |
| Image-iT™ TMRM Kit                                                                                   | Invitrogen                                 | Cat#I34361                                                         |
| Mitochondria Isolation Kit                                                                           | Sigma-Aldrich                              | Cat# 89874                                                         |
| Extracellular Oxygen Consumption Assay kit                                                           | Abcam                                      | ab197243                                                           |
| Cellular Superoxide Detection Assay kit                                                              | Abcam                                      | ab139477                                                           |
| ATP Assay Kit                                                                                        | Beyotime Biotechnology                     | S0026                                                              |
| MammoCult Human Medium Kit (for human tumorsphere culture)                                           | STEMCELL Technologies                      | Cat# 05620                                                         |
| Experimental Models: Cell Lines                                                                      |                                            |                                                                    |
| Human: HCC1937                                                                                       | ATCC                                       | CRL-2336                                                           |
| Human: HCC1806                                                                                       | ATCC                                       | CRL-2335                                                           |
| Human: HCC70                                                                                         | ATCC                                       | CRL-2315                                                           |
| Human: HCC38                                                                                         | ATCC                                       | CRL-2314                                                           |
| Human: BT20                                                                                          | ATCC                                       | HTB-19                                                             |
| Human: SUM149 and SUM159                                                                             | Stephen P. Ethier, Ph.D.                   | Medical University of South Carolina                               |
| MDA-MB-231 <i>NQO1</i> <sup>+</sup> and MDA-MB-231 <i>NQO1</i> <sup>-</sup> isogenic TNBC cell lines | Donated by the late Dr. David A. Boothman. | Indiana University School of Medicine, Indianapolis, IN 46202, USA |
| Vari068 TNBC cell line, derived from patient-derived xenograft tumors.                               | University of Michigan                     | N/A                                                                |
| Human: Hs578t                                                                                        | ATCC                                       | HTB-126                                                            |
| Human: MDA-MB-157                                                                                    | ATCC                                       | HTB-24                                                             |
| Human: MDA-MB-231                                                                                    | ATCC                                       | CRM-HTB-26                                                         |
| Human: MDA-MB-453                                                                                    | ATCC                                       | HTB-131                                                            |

|                                                    |                                    |                                                                                                                       |
|----------------------------------------------------|------------------------------------|-----------------------------------------------------------------------------------------------------------------------|
| Human: MDA-MB-468                                  | ATCC                               | HTB-132                                                                                                               |
| Human: MCF7                                        | ATCC                               | HTB-22                                                                                                                |
| Human: ZR-75-1                                     | ATCC                               | CRL-1500                                                                                                              |
| Human: MCF10A                                      | ATCC                               | CRL-10317                                                                                                             |
| Experimental Models: Organisms/Strains             |                                    |                                                                                                                       |
| Mouse strain: Fox Chase SCID                       | Charles River Laboratories         | Strain Code: 236                                                                                                      |
| Recombinant DNA                                    |                                    |                                                                                                                       |
| TRIPZ Inducible Lentiviral Human NQO1 shRNA        | Horizon Discovery                  | V2THS_235287                                                                                                          |
| TRIPZ Inducible Lentiviral Human SOD1 shRNA        | Horizon Discovery                  | V3THS_369718                                                                                                          |
| TRIPZ Inducible Lentiviral Human SOD2 shRNA        | Horizon Discovery                  | V3THS_307804                                                                                                          |
| TRIPZ Inducible Lentiviral Human CAT shRNA         | Horizon Discovery                  | V2THS_150247                                                                                                          |
| SMARTvector Inducible Lentiviral Human NQO1 shRNA  | Horizon Discovery                  | V3IHSHER_10771835                                                                                                     |
| SMARTvector Inducible Lentiviral Human NQO1 shRNA  | Horizon Discovery                  | V3IHSHER_7177739                                                                                                      |
| SMARTvector Inducible Lentiviral Human NQO1 shRNA  | Horizon Discovery                  | V3IHSHER_8909942                                                                                                      |
| SMARTvector Inducible Lentiviral Human SOD1 shRNA  | Horizon Discovery                  | V3IHSHER_9961124                                                                                                      |
| SMARTvector Inducible Lentiviral Human SOD1 shRNA  | Horizon Discovery                  | V3IHSHER_9099989                                                                                                      |
| TRIPZ Inducible Lentiviral shRNA Scrambled Control | University of Michigan vector core | N/A                                                                                                                   |
| Software and Algorithms                            |                                    |                                                                                                                       |
| ELDA                                               | WEHI Bioinformatics Resources      | <a href="http://bioinf.wehi.edu.au/software/el-da/index.html">http://bioinf.wehi.edu.au/software/el-da/index.html</a> |
| FlowJo                                             | FlowJo, LLC                        | <a href="https://www.flowjo.com/solutions/flowjo/">https://www.flowjo.com/solutions/flowjo/</a>                       |
| GraphPad Prism                                     | GraphPad Software Inc              | <a href="http://www.graphpad.com/scientific-software/prism/">http://www.graphpad.com/scientific-software/prism/</a>   |
| ImageJ                                             | NIH                                | <a href="https://imagej.nih.gov/ij/">https://imagej.nih.gov/ij/</a>                                                   |
| Compusyn                                           | ComboSyn, Inc.                     | <a href="https://www.combosyn.com">https://www.combosyn.com</a>                                                       |
